# Supplementary material for: Medical device surveillance with electronic health records
Source: PubMed Central journal article supplement (PMC6761113; doi:10.1038/s41746-019-0168-z), 2019-09-25
Supplement: 41746_2019_168_MOESM1_ESM.pdf [file 41746_2019_168_MOESM1_ESM.pdf]

# Supplementary Material

## Supplementary Methods

### Dictionary-based preprocessing

For hip implant systems, we built a dictionary of system names by querying the FDA Global Unique Device Identifier Database<sup>1</sup>, which captures >900 hip implant components including femoral stems, femoral heads, acetabular components, and liners. For pain, we built a dictionary of 31 terms (e.g. 'pain', 'tender',) through manual inspection of notes. A complications dictionary of 452 terms was built via manual inspection of notes by clinical experts. Dictionaries were automatically expanded using an open source corpus processor<sup>2</sup> to capture synonyms and misspellings. The dictionary of anatomical entities consisted of all strings in the Foundational Model of Anatomy (FMA)<sup>3</sup>, a small dictionary of informal abbreviations ("abd" -> "abdomen"), and regular expressions for standard anatomical terms of position (e.g., "lateral left knee").

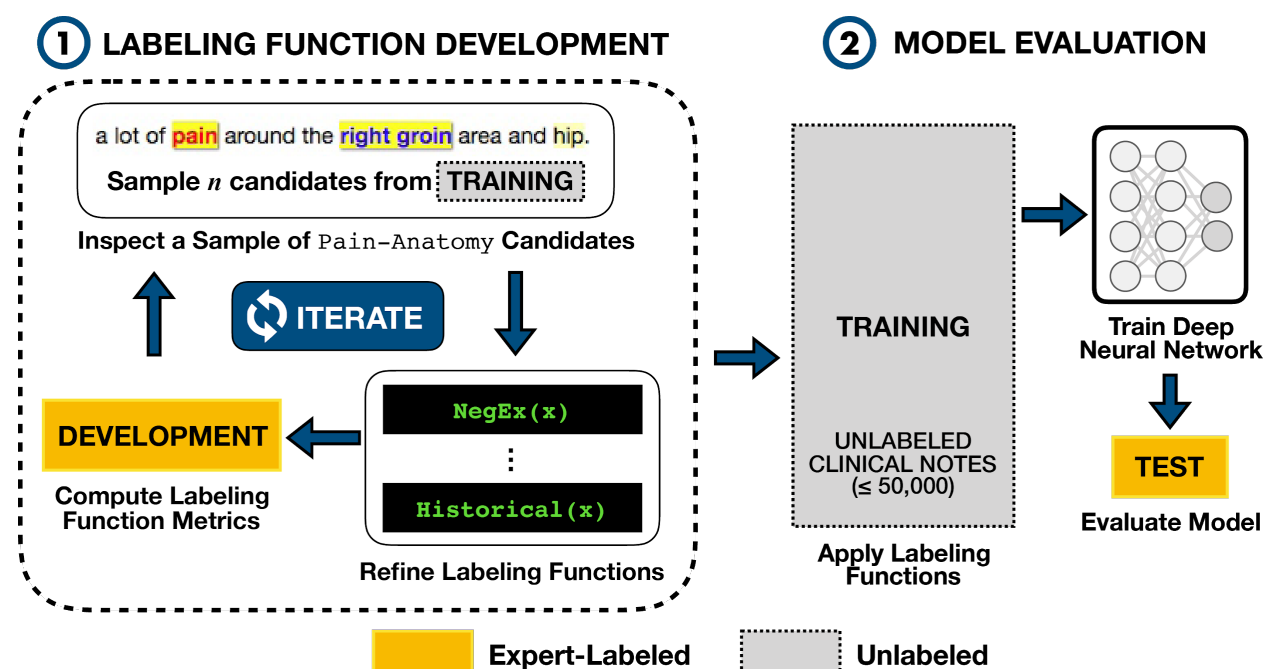

**Supplementary Figure 1.** The labeling function development and model evaluation workflow. In (1) domain experts examine unlabeled candidate relationships to gain insight into writing and refining labeling functions. These functions are then empirically evaluated for accuracy, precision, recall, and F1 score on an expert-labeled development set. This is an iterative process until the desired labeling function performance is achieved on the development set. In (2) the final labeling functions are applied to a large collection of unlabeled data to generate probabilistic labels for training a deep learning model. The resulting trained model is evaluated on expert-labeled unseen test set. This approach requires orders of magnitude less hand-labeled data than what would be needed for directly training deep learning model in (2), because hand-labeled data is only used to develop labeling functions and to evaluate final model performance.

## Concept extraction models

By restricting our implant candidate extraction to the specific operative notes for each patient's THA procedure, we sufficiently disambiguated implant mentions to achieve high performance using dictionary-based string matching. Thus our implant candidates were used directly as our final implant outputs.

For pain extraction, we learned a generative model from labeling functions applied to unlabeled patient notes to create a probabilistically labeled training set. We then used this data to train a state-of-the-art *Bidirectional Long Short-Term Memory* (LSTM)<sup>4</sup> neural network with attention as our end discriminative model. Hyperparameter tuning was done using random search over 10 models, using a parameter grid derived from the literature (batch\_size: {32, 128, 256}, dropout: {0.0, 0.25, 0.5}, emb\_dim: {100, 300, 500}, output\_layer\_size: {50, 100, 400}, lstm\_layers: {1,2,4}, learning\_rate: [1e-4, 1e-2]).

For the final predicted pain events, all anatomical entities were normalized to UMLS concept unique identifiers (CUIs) using rule-based linking to the FMA. CUIs were linked to the most specific (i.e., longest distance to root node) concept in the FMA.

## Supplementary Results

### Modeling pain outcomes as relations enables detection of long-distance mentions

In our gold set, 52.51% of all Pain-Anatomy mentions occurred 1 or more words apart. At a note-level, 39% of positive pain relations occurred *only* as long distance mentions. These long distance relations also contain different information compared to compound mentions (e.g., “hip pain”): for notes containing both mention types, the anatomical locations mentioned overlap by only 15% on average.

### Structured revision record-free survival among implant systems

Supplementary Figure 2 summarizes the risk of revision for implant systems when including evidence from structured records of revision only. Based on this data, no implant system is associated with a significantly higher or lower risk of revision. Supplementary Figures 3-7 summarize the risk of component wear, mechanical failure, particle disease, radiographic abnormality and infection (the complication subclasses detected by our extraction pipeline) for implant systems.

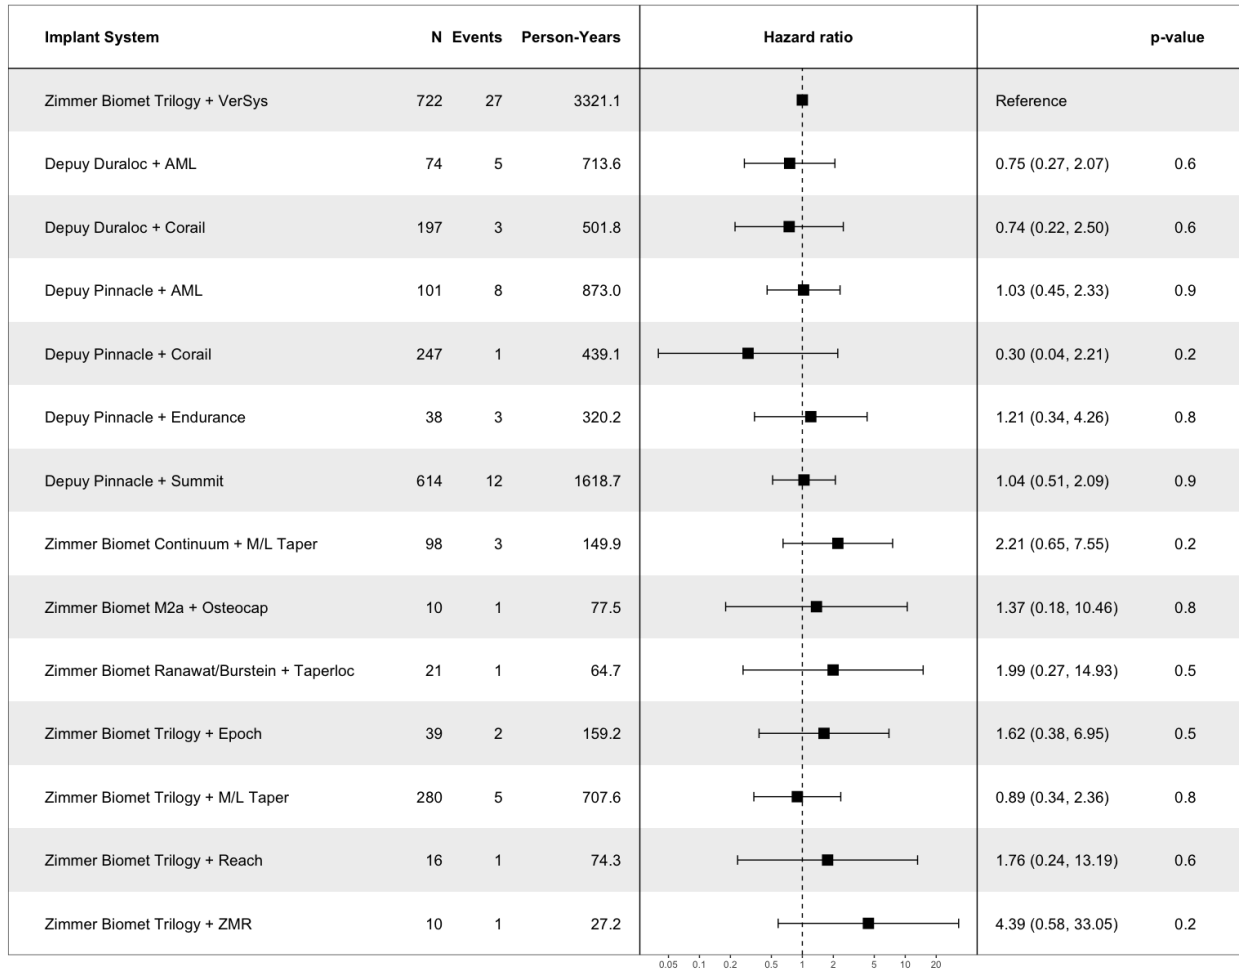

**Supplementary Figure 2. Summary of Cox proportional hazards analysis of the risk of revision for each hip implant system, when including only structured records of revision.** The table on the left lists the number of patients implanted with each system, the number of revision events observed for each based on structured records only, and the total person-years of data available. The forest plot displays the corresponding hazard ratio, with the hazard ratio (95% confidence interval) and p-value listed in the table to the right. Note that this figure only shows implant systems for which at least one revision event was detected.

### Post-implant complication-free survival among implant systems

Supplementary Figures 3-7 summarize the risk of each class of post-implant complication for different implant systems, as derived by a Cox proportional hazards analysis.

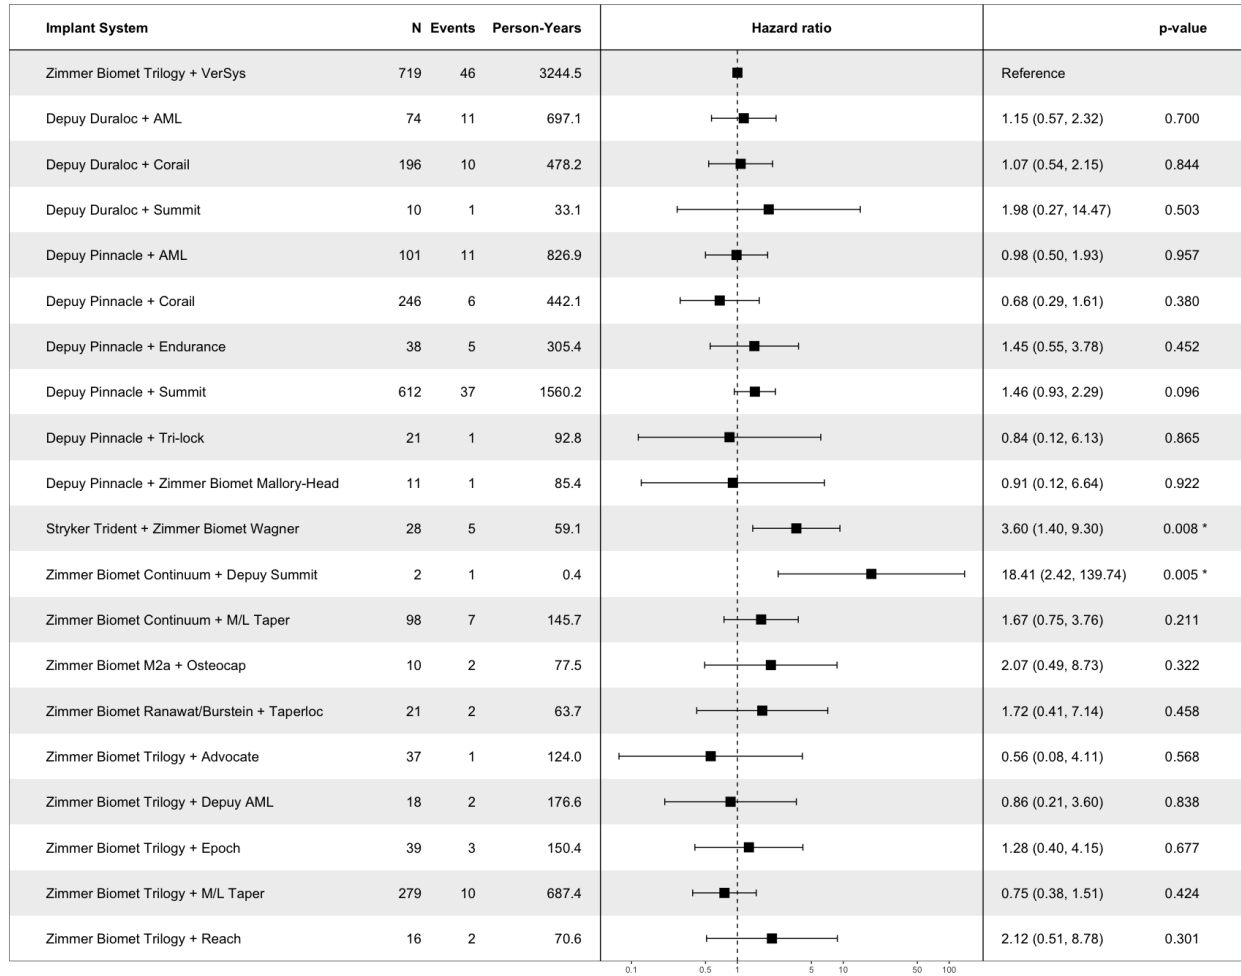

**Supplementary Figure 3. Summary of Cox proportional hazards analysis of the risk of component wear for each hip implant system.** The table on the left lists the number of patients implanted with each system, the number of component wear events observed for each, and the total person-years of data available. The forest plot displays the corresponding hazard ratio, with the hazard ratio (95% confidence interval) and p-value listed in the table to the right. Note that this figure only shows implant systems for which at least one component wear event was detected.

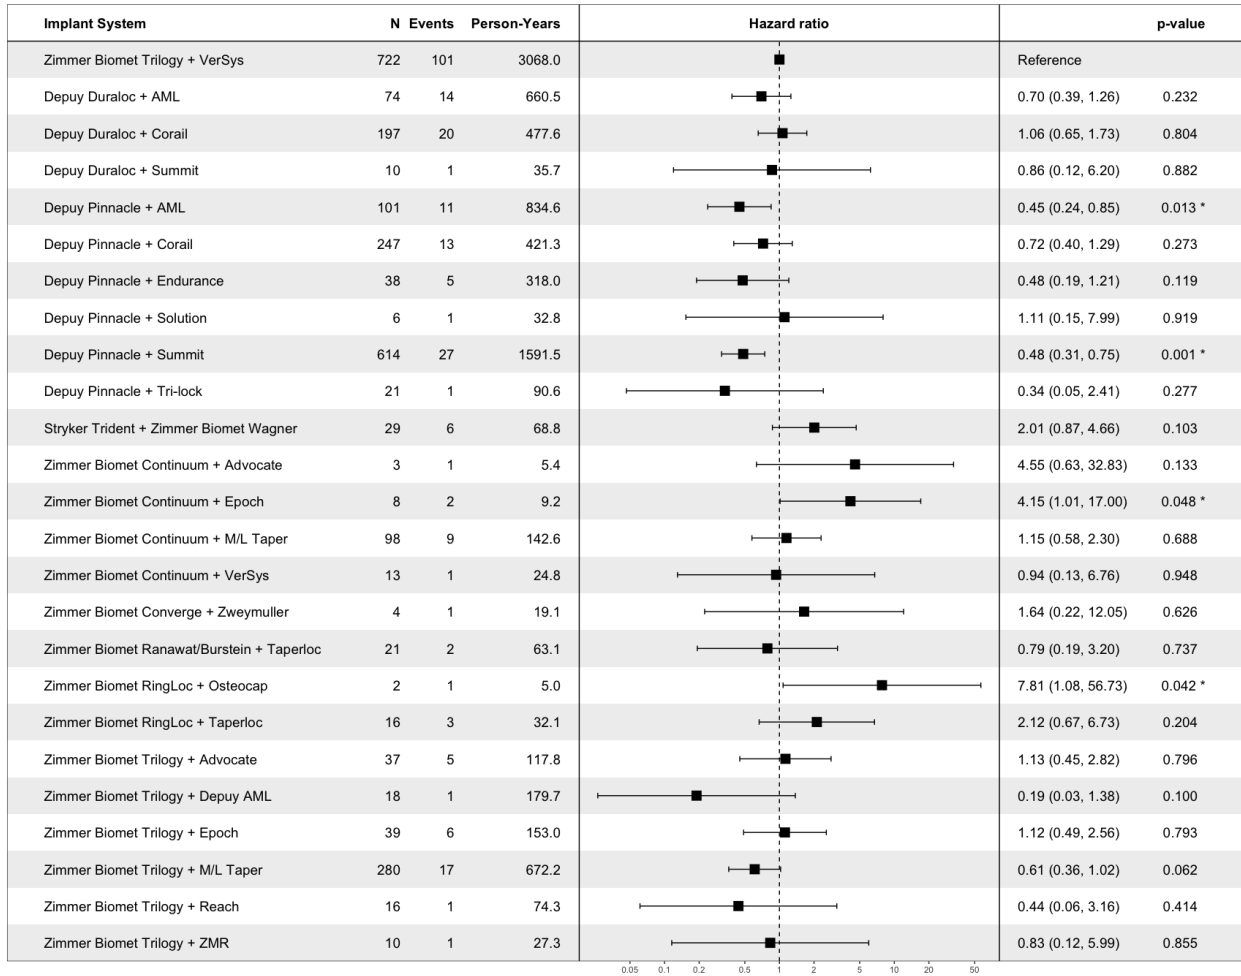

**Supplementary Figure 4. Summary of Cox proportional hazards analysis of the risk of mechanical failure for each hip implant system.** The table on the left lists the number of patients implanted with each system, the number of mechanical failure events observed for each, and the total person-years of data available. The forest plot displays the corresponding hazard ratio, with the hazard ratio (95% confidence interval) and p-value listed in the table to the right. Note that this figure only shows implant systems for which at least one mechanical failure event was detected.

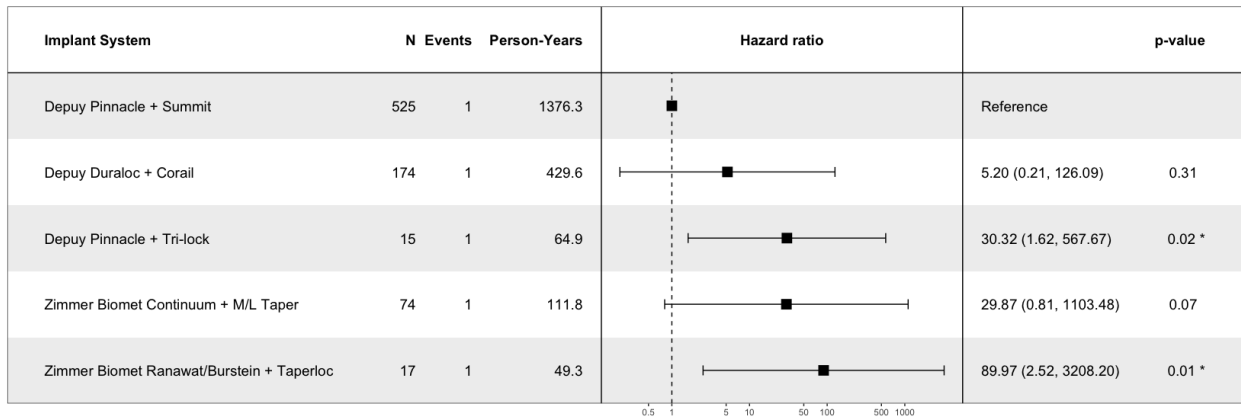

**Supplementary Figure 5. Summary of Cox proportional hazards analysis of the risk of particle disease for each hip implant system.** The table on the left lists the number of patients implanted with each system, the number of particle disease events observed for each, and the total person-years of data available. The forest plot displays the corresponding hazard ratio, with the hazard ratio (95% confidence interval) and p-value listed in the table to the right. Note that this figure only shows implant systems for which at least one particle disease event was detected.

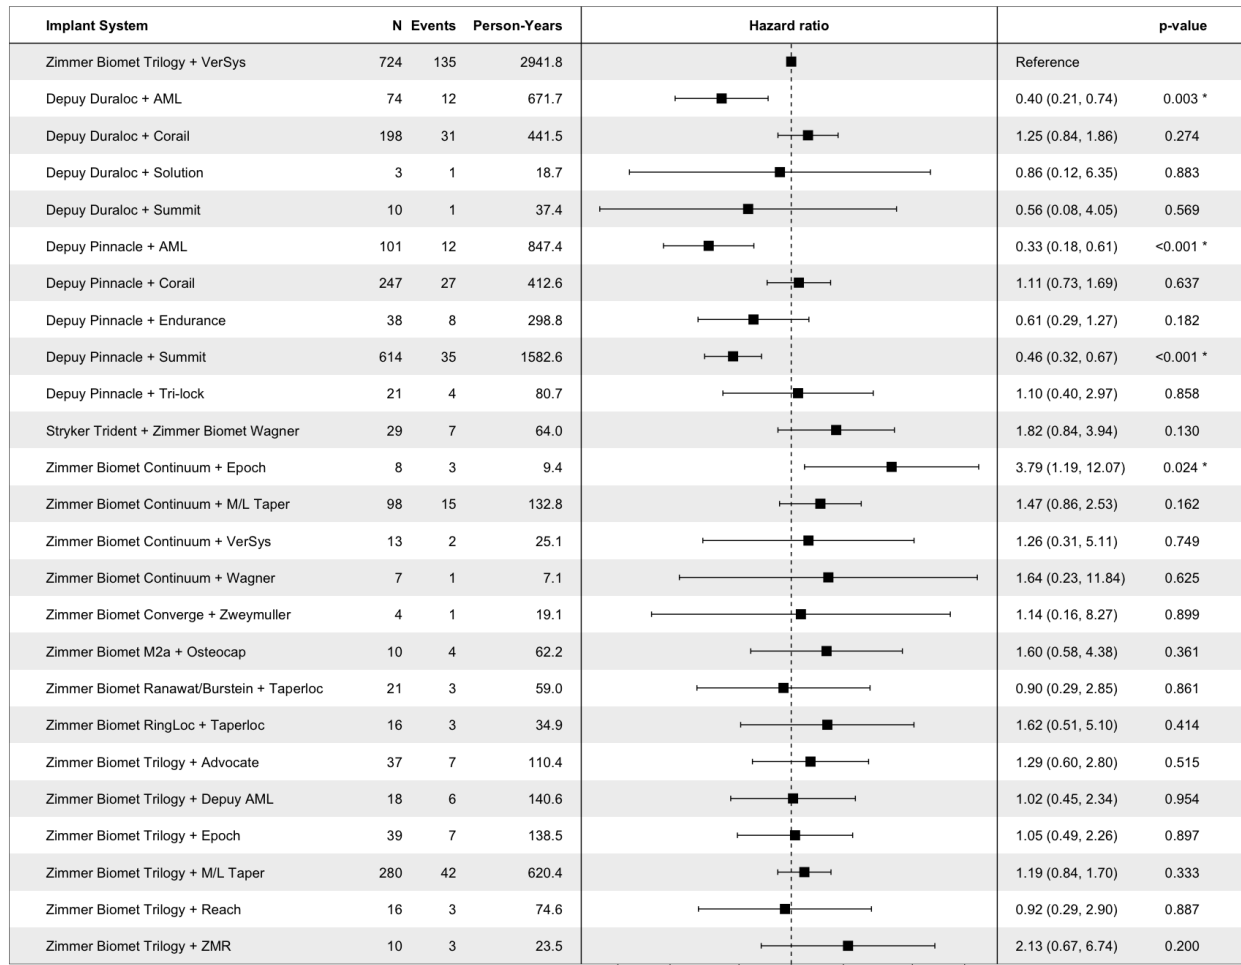

**Supplementary Figure 6. Summary of Cox proportional hazards analysis of the risk of radiographic abnormality for each hip implant system.** The table on the left lists the number of patients implanted with each system, the number of radiographic abnormality events observed for each, and the total person-years of data available. The forest plot displays the corresponding hazard ratio, with the hazard ratio (95% confidence interval) and p-value listed in the table to the right. Note that this figure only shows implant systems for which at least one radiographic abnormality event was detected.

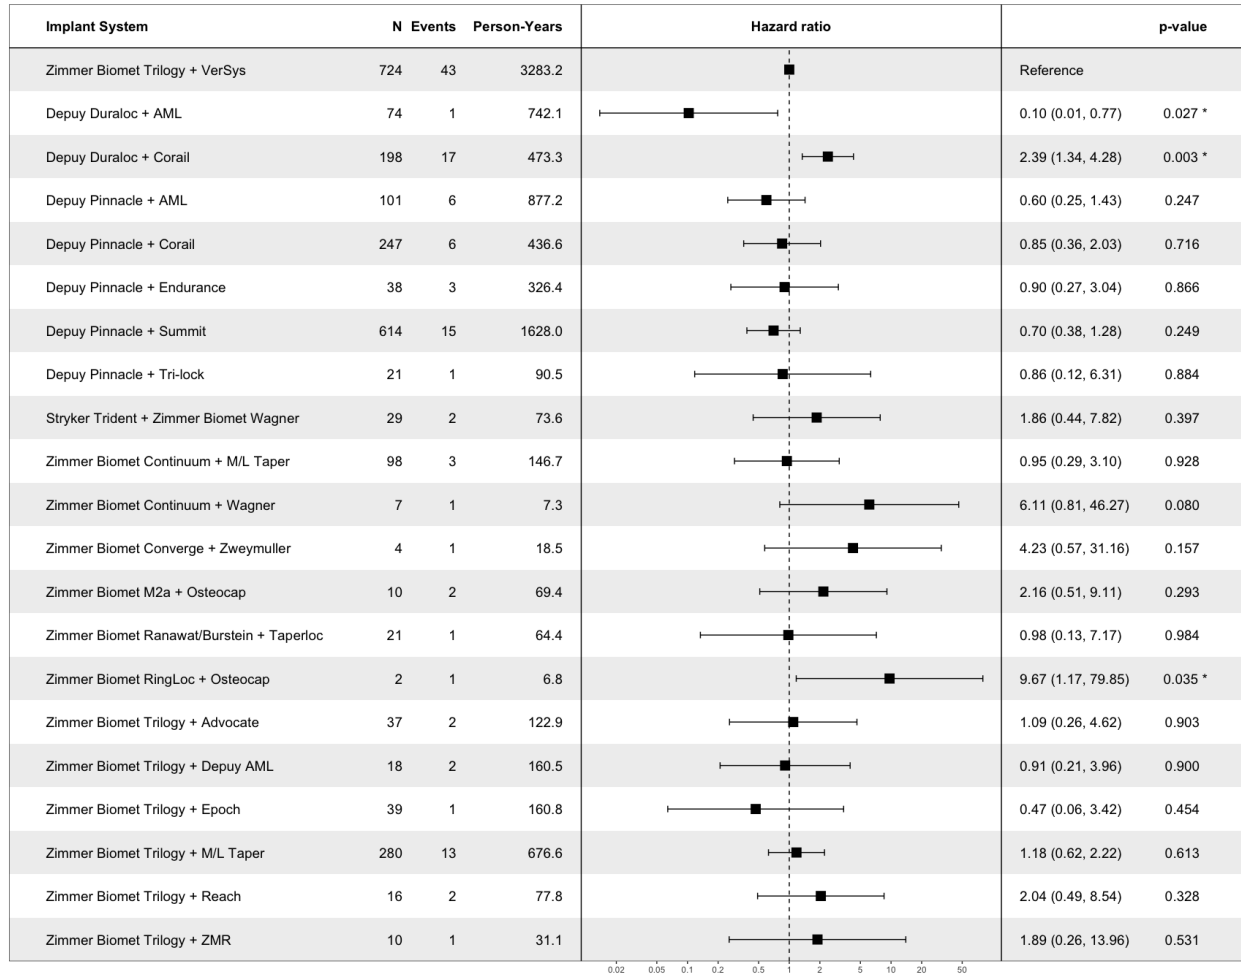

**Supplementary Figure 7. Summary of Cox proportional hazards analysis of the risk of infection for each hip implant system.** The table on the left lists the number of patients implanted with each system, the number of infection events observed for each, and the total person-years of data available. The forest plot displays the corresponding hazard ratio, with the hazard ratio (95% confidence interval) and p-value listed in the table to the right. Note that this figure only shows implant systems for which at least one infection event was detected.

### Post-implant hip pain is associated with implant system

Supplementary Table 1 lists the model coefficient estimate, incident rate ratio (IRR), lower and upper 95% confidence interval bounds, and p-values for the negative binomial model of hip pain in the year post-THA.

**Supplementary Table 1.** Negative binomial model coefficients, IRR (95% confidence interval) and p-value for hip pain in the year after THA.

| Variable                            | Estimate  | IRR (95% CI)         | p-value   |
|-------------------------------------|-----------|----------------------|-----------|
| (Intercept)                         | 0.828     | 2.290 (1.455-3.604)  | < 0.001 * |
| <b>Implant System</b>               |           |                      |           |
| Zimmer Biomet Trilogy + VerSys      | Reference |                      |           |
| Depuy Duraloc + AML                 | -3.415    | 0.033 (0.012-0.091)  | < 0.001 * |
| Depuy Duraloc + Corail              | 0.238     | 1.268 (1.020 -1.577) | 0.033 *   |
| Depuy Duraloc + Summit              | -1.827    | 0.161 (0.040-0.652)  | 0.011 *   |
| Depuy M2A + Osteocap                | 0.408     | 1.504 (0.640-3.537)  | 0.350     |
| Depuy Pinnacle + AML                | -2.334    | 0.097 (0.057-0.164)  | < 0.001 * |
| Depuy Pinnacle + Corail             | -0.521    | 0.594 (0.475-0.742)  | < 0.001 * |
| Depuy Pinnacle + Endurance          | -3.431    | 0.032 (0.008-0.137)  | < 0.001 * |
| Depuy Pinnacle + Solution           | -0.417    | 0.659 (0.199-2.187)  | 0.496     |
| Depuy Pinnacle + Summit             | -1.020    | 0.361 (0.301-0.432)  | < 0.001 * |
| Depuy Pinnacle + TriLock            | -0.524    | 0.592 (0.300-1.171)  | 0.132     |
| Zimmer Biomet Continuum + Epoch     | 0.530     | 1.700 (0.679-4.257)  | 0.258     |
| Zimmer Biomet Continuum + M/L Taper | 0.723     | 2.061 (1.561-2.720)  | < 0.001 * |
| Zimmer Biomet Continuum + VerSys    | 0.589     | 1.802 (0.881-3.685)  | 0.107     |
| Zimmer Biomet Continuum + Wagner    | -0.352    | 0.703 (0.242-2.047)  | 0.518     |
| Zimmer Biomet Trilogy + Depuy AML   | -0.411    | 0.663 (0.321-1.367)  | 0.266     |
| Zimmer Biomet Trilogy + Epoch       | 0.313     | 1.368 (0.884-2.117)  | 0.160     |
| Zimmer Biomet Trilogy + M/L Taper   | 0.399     | 1.490 (1.234-1.799)  | < 0.001 * |
| Zimmer Biomet Trilogy + Reach       | -0.345    | 0.708 (0.335-1.499)  | 0.367     |
| Zimmer Biomet Trilogy + Wagner      | 0.607     | 1.834 (1.120-3.004)  | 0.016 *   |
| Zimmer Biomet Trilogy + ZMR         | -0.237    | 0.789 (0.319-1.953)  | 0.608     |
| Other system                        | -0.278    | 0.757 (0.504-1.138)  | 0.181     |
| <b>Charlson Comorbidity Index</b>   |           |                      |           |
| None                                | Reference |                      |           |



|                           |           |                     |           |
|---------------------------|-----------|---------------------|-----------|
| Low                       | 0.141     | 1.151 (0.956-1.386) | 0.137     |
| Moderate                  | 0.040     | 1.040 (0.809-1.338) | 0.758     |
| High                      | 0.234     | 1.264 (0.997-1.601) | 0.053     |
| <b>Age</b>                |           |                     |           |
| 40-49 years               | Reference |                     |           |
| 50-59 years               | -0.035    | 0.965 (0.794-1.174) | 0.723     |
| 60-69 years               | 0.050     | 1.051 (0.870-1.269) | 0.606     |
| 70-79 years               | -0.062    | 0.940 (0.768-1.151) | 0.549     |
| 80+ years                 | -0.219    | 0.803 (0.632-1.020) | 0.072     |
| <b>Sex</b>                |           |                     |           |
| Female                    | Reference |                     |           |
| Male                      | 0.010     | 1.010 (0.898-1.137) | 0.862     |
| <b>Race</b>               |           |                     |           |
| Asian                     | Reference |                     |           |
| Black                     | 0.108     | 1.114 (0.726-1.709) | 0.620     |
| Native American           | -0.171    | 0.843 (0.171-4.162) | 0.834     |
| Other                     | 0.394     | 1.482 (1.047-2.099) | 0.027 *   |
| Pacific Islander          | 0.357     | 1.430 (0.598-3.420) | 0.422     |
| Unknown                   | 0.053     | 1.055 (0.684-1.626) | 0.810     |
| White                     | -0.030    | 0.970 (0.751-1.253) | 0.817     |
| <b>Ethnicity</b>          |           |                     |           |
| Hispanic                  | Reference |                     |           |
| Not Hispanic              | 0.036     | 1.036 (0.746-1.439) | 0.832     |
| Unknown                   | -0.719    | 0.487 (0.328-0.723) | < 0.001 * |
| <b>Other covariates</b>   |           |                     |           |
| Pain in year prior to THA | 0.071     | 1.073 (1.049-1.099) | < 0.001 * |
| Follow-up time            | -0.001    | 0.999 (0.999-1.000) | 0.001 *   |

## Relation extraction system performance

Supplementary Table 2 details Pain-Anatomy extraction performance given 150 - 50,000 weakly labeled training documents. Here we see performance improvements up to +9.2 F1 points over soft majority vote as we increase the scale of weakly labeled data provided to the deep learning model.

**Supplementary Table 2.** Pain-Anatomy Relation Extraction Performance

| Model                  | Training Set Size (Number of Documents) |      |      |      |      |      |      |      |      |      |             |             |
|------------------------|-----------------------------------------|------|------|------|------|------|------|------|------|------|-------------|-------------|
|                        | 150                                     |      |      | 5K   |      |      | 10K  |      |      | 50K  |             |             |
|                        | P                                       | R    | F1   | P    | R    | F1   | P    | R    | F1   | P    | R           | F1          |
| Supervised-LSTM ♦      | 72.5                                    | 78.4 | 75.4 | -    | -    | -    | -    | -    | -    | -    | -           | -           |
| Soft Majority Vote     | <b>81.4</b>                             | 64.8 | 72.2 | -    | -    | -    | -    | -    | -    | -    | -           | -           |
| Weakly Supervised LSTM | 68.4                                    | 81.8 | 74.5 | 75.1 | 80.5 | 77.7 | 76.4 | 80.9 | 78.6 | 80.2 | <b>82.6</b> | <b>81.4</b> |

♦ Uses hand-labeled training data

Blue highlighting Highest achieved value for metric (P, R, F1)

Supplementary Table 3 contains a non-exhaustive list of example terms for each Implant-Complication category. These terms form disjoint sets for each Implant-Complication subcategory.

**Supplementary Table 3.** Example Terms for Implant-Complication Subcategories

| Subcategory              | Terms                                                             |
|--------------------------|-------------------------------------------------------------------|
| Mechanical failure       | hardware loosening, crooked, asymmetrically seated                |
| Revision                 | reoperation, removals, revision, rebuilt, hardware removal        |
| Component wear           | polyethylene wear, worn, wearing, bearing surface wear, debonding |
| Infection                | infection, septic, abscess, re-infected                           |
| Particle disease         | particle disease, metal ion toxicity, metallosis                  |
| Radiographic abnormality | lucencies, pedestals, heterotopic calcifications, spurs           |

Supplementary Table 4 contains full performance metrics for all extracted relations, including Implant-Complication sub-categories. Confidence intervals are computed using test set bootstrapping with n=1000 replicates.

**Supplementary Table 4.** Performance Metrics for all Relations

| Complication Type           | Mentions | BASELINE<br>Soft Majority Vote |                        |                        | Fully Supervised<br>(n= 150 docs) |                |               | Weakly Supervised<br>Model |                        |                        | +/- F1 |
|-----------------------------|----------|--------------------------------|------------------------|------------------------|-----------------------------------|----------------|---------------|----------------------------|------------------------|------------------------|--------|
|                             | N        | P<br>(SD)                      | R<br>(SD)              | F1<br>(SD)             | P<br>(SD)                         | R<br>(SD)      | F1<br>(SD)    | P<br>(SD)                  | R<br>(SD)              | F1<br>(SD)             | %      |
| <b>Pain-Anatomy</b>         | 236      | <b>81.4<br/>(2.8)</b>          | 64.8<br>(3.0)          | 72.1<br>(2.3)          | 72.5<br>(2.9)                     | 78.3<br>(2.6)  | 75.3<br>(2.1) | 80.2<br>(2.6)              | <b>82.5<br/>(2.4)</b>  | <b>81.3<br/>(1.9)</b>  | +12.8  |
| <b>Implant-Complication</b> | 276      | 81.6<br>(3.6)                  | 31.7<br>(2.7)          | 45.6<br>(3.1)          | 50.8<br>(3.1)                     | 47.1<br>(3.1)  | 48.8<br>(2.7) | <b>82.6<br/>(2.6)</b>      | <b>61.1<br/>(2.9)</b>  | <b>70.2<br/>(2.3)</b>  | +53.9  |
| Revision                    | 63       | 74.4<br>(6.9)                  | 45.8<br>(5.9)          | 56.5<br>(5.7)          | 41.8<br>(4.8)                     | 68.2<br>(6.0)  | 51.7<br>(4.7) | <b>75.6<br/>(6.1)</b>      | <b>58.6<br/>(6.0)</b>  | <b>65.9<br/>(5.1)</b>  | +16.6  |
| Component Wear              | 48       | 71.1<br>(8.8)                  | 42.4<br>(7.3)          | 52.8<br>(7.1)          | <b>78.4<br/>(9.8)</b>             | 31.7<br>(7.0)  | 44.8<br>(7.9) | 72.7<br>(6.5)              | <b>72.9<br/>(6.4)</b>  | <b>72.9<br/>(5.3)</b>  | +38.1  |
| Mechanical Failure          | 25       | 87.1<br>(13.2)                 | 27.8<br>(9.5)          | 41.3<br>(11.4)         | 21.5<br>(7.6)                     | 27.3<br>(9.2)  | 23.7<br>(7.7) | <b>90.9<br/>(8.8)</b>      | <b>43.6<br/>(10.2)</b> | <b>58.2<br/>(10.1)</b> | +40.9  |
| Particle Disease            | 65       | 80.2<br>(19.5)                 | 6.2<br>(3.0)           | 11.6<br>(5.2)          | 54.1<br>(7.9)                     | 32.5<br>(5.9)  | 40.3<br>(6.1) | <b>97.1<br/>(2.8)</b>      | <b>52.5<br/>(6.0)</b>  | <b>68.0<br/>(5.2)</b>  | +486.2 |
| Radiographic Abnormality    | 17       | <b>99.8<br/>(4.5)</b>          | <b>33.5<br/>(10.9)</b> | <b>49.1<br/>(12.4)</b> | 37.2<br>(9.2)                     | 55.9<br>(12.2) | 44.1<br>(9.3) | 59.7<br>(16.6)             | 35.4<br>(12.0)         | 43.6<br>(12.5)         | -12.6  |
| Infection                   | 58       | <b>100.0<br/>(0.0)</b>         | 39.8<br>(6.5)          | 56.6<br>(6.7)          | 90.1<br>(4.6)                     | 62.0<br>(6.5)  | 73.3<br>(5.2) | 90.8<br>(4.0)              | <b>84.6<br/>(4.9)</b>  | <b>87.5<br/>(3.4)</b>  | +54.6  |

## References

1. U S Food And Drug Administration. Global UDI Database (GUDID). Available at: <https://www.fda.gov/MedicalDevices/DeviceRegulationandGuidance/UniqueDeviceIdentification/GlobalUDIDatabaseGUDID/default.htm>. (Accessed: 30th March 2018)
2. Paumier, S., Nakamura, T. & Voyatzi, S. UNITEX, a Corpus Processing System with Multi-Lingual Linguistic Resources. eLEX2009 (2009).
3. Rosse, C. & Mejino, J. L. V., Jr. A reference ontology for biomedical informatics: the Foundational Model of Anatomy. *J. Biomed. Inform.* **36**, 478–500 (2003).
4. Zhou, P. et al. Attention-based bidirectional long short-term memory networks for relation classification. in Proceedings of the 54th Annual Meeting of the Association for Computational Linguistics (Volume 2: Short Papers) **2**, 207–212 (2016).
